# Supplementary material for: Porous Biomass Carbon Derived from Clivia miniata Leaves via NaOH Activation for Removal of Dye
Source: MDPI journal article supplement (doi:10.3390/ma15041285), 2022-02-09
Supplement: s1 [file s1]

# Porous Biomass Carbon Derived From *Clivia miniata* Leaves via NaOH Activation for Removal of Dye

Wei Gao<sup>1,\*</sup>

College of Landscape Architecture, Changchun University, Changchun 130000, China;

\* Correspondence: gaow@ccu.edu.cn

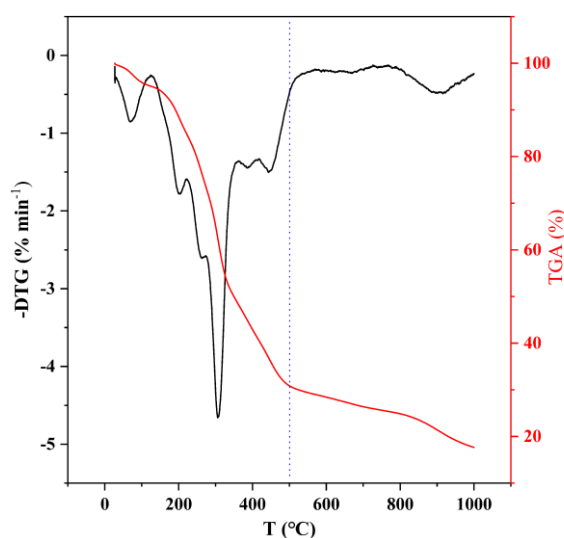

**Figure S1.** TGA and DTG curves of CM with the heating rate of 10 °C/min under the atmosphere of N<sub>2</sub>.

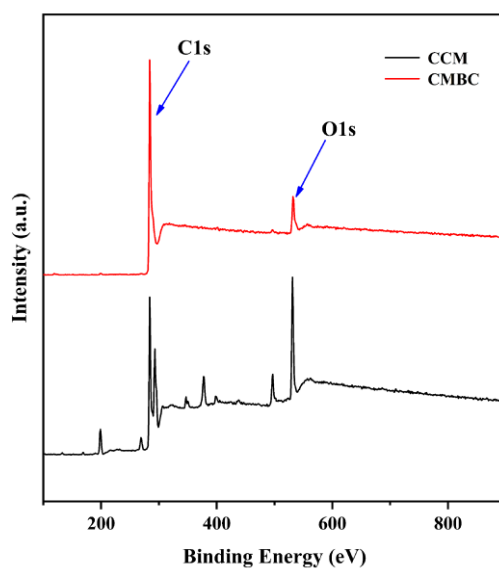

**Figure S2.** XPS test of CCM and CMBC.

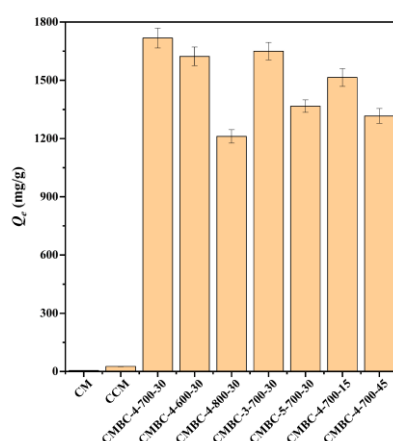

**Figure S3.** The adsorption capacities of CMBC prepared at different conditions to MG ( $T$ : 303 K; Adsorbent: 10 mg;  $C_0$ : 400 mg/L;  $V$ : 100 ml).

**Table S1** Comparison of the adsorption capacities of samples to MG with other adsorbents.

| Adsorbent                                  | pH      | Time    | Temperature (K) | $Q_e$ (mg/g) | References |
|--------------------------------------------|---------|---------|-----------------|--------------|------------|
| Poly lactide/spent brewery grains films    | 4.5     | 45 min  | 296             | 1.5          | [1]        |
| Brewers' spent grain                       | neutral | 120 min | 296             | 2.6          | [2]        |
| Neem sawdust                               | 7.2     | 20 min  | 298             | 4.4          | [3]        |
| Chemically modified rice husk              | 7       | 120 min | 298             | 12.2         | [4]        |
| Borassus aethiopum flower activated carbon | 6.87    | 24 h    | 300             | 20.5         | [5]        |
| Clayey soil of Indian origin               | 6.0     | 100 min | 303             | 78.6         | [6]        |
| Modified sphagnum peat moss                | 6.5     | 90      | 293             | 122.0        | [7]        |
| Rice straw-derived char                    | 5       | 2 h     | 303             | 148.7        | [8]        |

|                                                        |            |            |                         |            |              |
|--------------------------------------------------------|------------|------------|-------------------------|------------|--------------|
| Sodium carboxymethyl cellulose aerogels                | 7          | 12<br>h    | 298                     | 245.3      | [9]          |
| Activated carbon pellet                                | 3.2        | 24<br>h    | room<br>temperatu<br>re | 395.0      | [10]         |
| nZVI/BC                                                | 6          | 10<br>min  | 313                     | 515.8      | [11]         |
| AFA                                                    | 9          | 12<br>h    | 323                     | 637.6      | [12]         |
| Magnetic graphene oxide                                | 7          | 30<br>min  | 298                     | 714.3      | [13]         |
| TEMPO-oxidized cellulose beads                         | 6.86       | 300<br>min | 298                     | 740.0      | [14]         |
| Activated graphene                                     | neutr<br>a | 40<br>min  | 298                     | 791.3      | [15]         |
| Fibrous cellulose sulfate                              | neutr<br>a | 30<br>min  | 298                     | 960.0      | [16]         |
| Activated biochar derived from Opuntia<br>ficus-indica | 6          | 120<br>min | 303                     | 1341.<br>0 | [17]         |
| Porous Carbon Material Based on Quinoa Husk            | 7          | 120<br>min | 298                     | 1365.<br>1 | [18]         |
| CM                                                     | 3.8        | 120<br>min | 303                     | 5.4        | This<br>work |
| CCM                                                    | 3.8        | 120<br>min | 303                     | 26.2       | This<br>work |
| CMBC                                                   | 8          | 120<br>min | 303                     | 2622.<br>9 | This<br>work |

---

## References

- [1] Chanzu, H.; Onyari, J.; Shiundu, P. Biosorption of malachite green from aqueous solutions onto polylactide/spent brewery grains films: kinetic and equilibrium studies. *J. Polym. Environ.* 2012, 20, 665-672.
- [2] Chanzua, H.; Onyarib, J.; Shiundu, P. Brewers' spent grain in adsorption of aqueous Congo Red and malachite Green dyes: Batch and continuous flow systems. *J. Hazard. Mater.* 2019, 380, 120897.
- [3] Khattri, S.; Singh, M. Removal of malachite green from dye wastewater using neem sawdust by adsorption. *J. Hazard. Mater.* 2009, 167, 1089-1094.
- [4] Chowdhury, S.; Mishra, R.; Saha, P.; Kushwaha, P. Adsorption thermodynamics, kinetics and isosteric heat of adsorption of malachite green onto chemically modified rice husk. *Desalination.* 2011, 265, 159-168.
- [5] Nethaji, S.; Sivasamy, A.; Thennarasu, G.; Saravanan, S. Adsorption of Malachite Green dye onto activated carbon derived from *Borassus aethiopum* flower biomass. *J. Hazard. Mater.* 2010, 181, 271-280.
- [6] Saha, P.; Chowdhury, S.; Gupta, S.; Kumar, I. Insight into adsorption equilibrium, kinetics and thermodynamics of Malachite Green onto clayey soil of Indian origin. *Chem. Eng. J.* 2010, 165, 874-882.
- [7] Hemmati, F.; Norouzbeigi, R.; Sarbisheh, F.; Shayesteh, H. Malachite green removal using modified sphagnum peat moss as a low-cost biosorbent: Kinetic, equilibrium and thermodynamic studies. *J. Taiwan Inst. Chem. E.* 2015, 58, 482-489.
- [8] Hameed, B.; El-Khaiary, M. Kinetics and equilibrium studies of malachite green adsorption on rice straw-derived char. *J. Hazard. Mater.* 2008, 153, 701-708.
- [9] Yu, M.; Li, J.; Wang, L. KOH-activated carbon aerogels derived from sodium carboxymethyl cellulose for high-performance supercapacitors and dye adsorption. *Chem. Eng. J.* 2017, 310, 300-306.
- [10] Hui, S.; Zaini, T. Development of activated carbon pellets using a facile low-cost binder for effective malachite green dye removal. *J. Clean. Prod.* 2020, 253, 119970.

- [11] Eltaweil, A.; Mohamed, H.; El-Monaem, M.; El-Subruiti, G. Mesoporous magnetic biochar composite for enhanced adsorption of malachite green dye: Characterization, adsorption kinetics, thermodynamics and isotherms. *Adv. Powder. Technol.* 2020, 31, 1253-1263.
- [12] An, Y.; Zheng, H.; Zheng, X.; Sun, Q.; Zhou, Y. Use of a floating adsorbent to remove dyes from water: A novel efficient surface separation method. *J. Hazard. Mater.* 2019, 375, 138-148.
- [13] Yakout, A.; Shaker, M. Dodecyl sulphate functionalized magnetic graphene oxide nanosorbent for the investigation of fast and efficient removal of aqueous malachite green. *J. Taiwan Inst. Chem. E.* 2016, 63, 81-88.
- [14] Lin, F.; You, Y.; Yang, X.; Jiang, X.; Lu, Q.; Wang, T.; Huang, B.; Lu, B. Microwave-assisted facile synthesis of TEMPO-oxidized cellulose beads with high adsorption capacity for organic dyes. *Cellulose.* 2017, 24, 5025-5040.
- [15] Kim, M.; Sharma, N.; Chung, J.; Yun, K. Activated graphene with fractal structure for the adsorption of malachite green with high removal rate. *Micropor. Mesopor. Mat.* 2021, 322, 111166.
- [16] Baghdadi, M.; Soltani, B.; Nourani, M. Malachite green removal from aqueous solutions using fibrous cellulose sulfate prepared from medical cotton waste: Comprehensive batch and column studies. *J. Ind. Eng. Chem.* 2017, 55, 128-139.
- [17] Choudhary, M.; Kumar, R.; Neogi, S. Activated biochar derived from *Opuntia ficus-indica* for the efficient adsorption of malachite green dye,  $\text{Cu}^{+2}$  and  $\text{Ni}^{+2}$  from water. *J. Hazard. Mater.* 2020, 392, 122441.
- [18] Chen, S.; Tang, S.; Sun, Y.; Wang, G.; Chen, H.; Yu, X.; Su, Y.; Chen, G. Preparation of a Highly Porous Carbon Material Based on Quinoa Husk and Its Application for Removal of Dyes by Adsorption. *Materials.* 2018, 11, 1407.
